# Supplementary material for: Highly thermostable lanthanide(iii) MOFs constructed from 4,4′,4′′-s-triazine-2,4,6-triyl-tribenzoate ligand: synthesis, structure, and tunable white-light emission
Source: Royal Society of Chemistry journal article supplement (doi:10.1039/c6ce01585a), 2016-01-01
Supplement: c6ce01585a1.pdf [file c6ce01585a1.pdf]

*Supporting Information for*

**Highly Thermostable Two-Dimensional Lanthanide(III)  
Metal–Organic Frameworks Constructed from 4, 4', 4''-s-  
Triazine-2, 4, 6-triyl-tribenzoate Ligand: Synthesis,  
Structure, and Tunable White–Light Emission**

Jiewei Rong,<sup>a,b</sup> Wenwei Zhang\*<sup>a</sup> and Junfeng Bai\*<sup>a</sup>

*<sup>a</sup> State Key Laboratory of Coordination Chemistry, School of Chemistry and Chemical Engineering, Nanjing University, Nanjing 210023, P. R. China. E-mail: [wwzhang@nju.edu.cn](mailto:wwzhang@nju.edu.cn), [bjunfeng@nju.edu.cn](mailto:bjunfeng@nju.edu.cn)*

*<sup>b</sup> School of Chemical and Materials Engineering, Huainan Normal University, Huainan, Anhui 232038, P. R. China. E-mail: [zwj0076@126.com](mailto:zwj0076@126.com)*

**Table S1** Elemental analysis, yield and main IR bands for **1–8**

| Formula                                                                                                | C%<br>(Found) <sup>a</sup> | H%<br>(Found)  | N%<br>(Found)  | Yield <sup>b</sup> | Main IR Bands                                                                |
|--------------------------------------------------------------------------------------------------------|----------------------------|----------------|----------------|--------------------|------------------------------------------------------------------------------|
| <b>1</b> C <sub>65</sub> H <sub>75</sub> La <sub>2</sub> N <sub>7</sub> O <sub>21</sub> S <sub>7</sub> | 43.55<br>(43.44)           | 4.22<br>(4.09) | 5.47<br>(5.29) | 65%                | 3417 m, 2998 w, 2914 w, 1602 s, 1563 s, 1396 s, 1356 s, 1013 s, 814 m, 771 m |
| <b>2</b> C <sub>65</sub> H <sub>75</sub> Ce <sub>2</sub> N <sub>7</sub> O <sub>21</sub> S <sub>7</sub> | 43.49<br>(43.36)           | 4.21<br>(4.12) | 5.46<br>(5.38) | 70%                | 3425 m, 3016 w, 2914 w, 1594 s, 1558 s, 1396 s, 1356 s, 1013 s, 823 m, 770 m |
| <b>3</b> C <sub>65</sub> H <sub>75</sub> Pr <sub>2</sub> N <sub>7</sub> O <sub>21</sub> S <sub>7</sub> | 43.45<br>(43.25)           | 4.21<br>(4.05) | 5.46<br>(5.25) | 68%                | 3447 m, 3007 w, 2914 w, 1598 s, 1554 s, 1396 s, 1356 s, 1013 s, 819 m, 771 m |
| <b>4</b> C <sub>65</sub> H <sub>75</sub> Sm <sub>2</sub> N <sub>7</sub> O <sub>21</sub> S <sub>7</sub> | 43.00<br>(42.85)           | 4.16<br>(3.97) | 5.40<br>(5.41) | 75%                | 3421 m, 2998 w, 2914 w, 1594 s, 1554 s, 1396 s, 1352 s, 1013 s, 814 m, 775 m |
| <b>5</b> C <sub>65</sub> H <sub>75</sub> Eu <sub>2</sub> N <sub>7</sub> O <sub>21</sub> S <sub>7</sub> | 42.93<br>(42.75)           | 4.16<br>(3.92) | 5.39<br>(5.48) | 78%                | 3408 m, 2998 w, 2910 w, 1602 s, 1558 s, 1396 s, 1352 s, 1013 s, 823 m, 771 m |
| <b>6</b> C <sub>64</sub> H <sub>75</sub> Nd <sub>2</sub> N <sub>7</sub> O <sub>22</sub> S <sub>6</sub> | 43.30<br>(43.02)           | 4.26<br>(4.12) | 5.52<br>(5.49) | 75%                | 3412 m, 2998 w, 2910 w, 1602 s, 1558 s, 1400 s, 1356 s, 1013 s, 819 m, 766 m |
| <b>7</b> C <sub>64</sub> H <sub>75</sub> Gd <sub>2</sub> N <sub>7</sub> O <sub>22</sub> S <sub>6</sub> | 42.68<br>(42.41)           | 4.20<br>(4.01) | 5.44<br>(5.24) | 76%                | 3416 m, 3002 w, 2906 w, 1602 s, 1545 s, 1396 s, 1356 s, 1014 s, 823 m, 779 m |
| <b>8</b> C <sub>64</sub> H <sub>75</sub> Tb <sub>2</sub> N <sub>7</sub> O <sub>22</sub> S <sub>6</sub> | 42.60<br>(42.32)           | 4.19<br>(3.82) | 5.43<br>(5.49) | 64%                | 3421 m, 3002 w, 2914 w, 1594 s, 1554 s, 1400 s, 1352 s, 1018 s, 828 m, 771 m |

<sup>a</sup>Calculated value from formula, followed by experimental value in parentheses. <sup>b</sup>Yield was calculated based on rare earth metal.

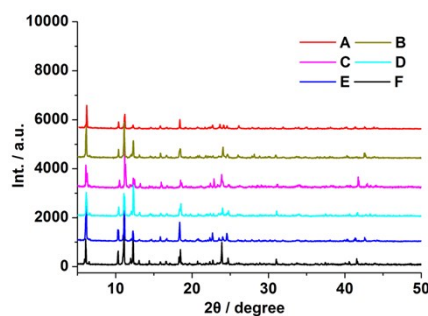

**Fig. S1** The PXRD patterns for complex **La-TATB (F)** and the codoped complexes **Eu<sub>x</sub>Tb<sub>y</sub>La<sub>1-x-y</sub>-TATB, A-E** (Eu, Tb, La%): **A** (25, 4.5, 70.5), **B** (24.5, 4, 71.5), **C** (25.5, 3.5, 71), **D** (**24, 3, 73**), and **E** (23.5, 2, 74.5).

**Table S2** Elemental analysis for the co-doped compounds

| Ln-TATB                                                           | Wt% C         | Wt% H         | Wt% N         |
|-------------------------------------------------------------------|---------------|---------------|---------------|
|                                                                   | Calcd (Found) | Calcd (Found) | Calcd (Found) |
| <b>Eu<sub>0.25</sub>Tb<sub>0.045</sub>La<sub>0.705</sub>-TATB</b> | 43.35 (43.43) | 4.20 (4.10)   | 5.44 (5.34)   |
| <b>Eu<sub>0.245</sub>Tb<sub>0.04</sub>La<sub>0.715</sub>-TATB</b> | 43.36 (43.45) | 4.20 (4.09)   | 5.45 (5.31)   |
| <b>Eu<sub>0.255</sub>Tb<sub>0.035</sub>La<sub>0.71</sub>-TATB</b> | 43.36 (43.44) | 4.20 (4.12)   | 5.45 (5.28)   |
| <b>Eu<sub>0.24</sub>Tb<sub>0.03</sub>La<sub>0.73</sub>-TATB</b>   | 43.37 (43.45) | 4.20 (4.07)   | 5.45 (5.24)   |
| <b>Eu<sub>0.235</sub>Tb<sub>0.02</sub>La<sub>0.745</sub>-TATB</b> | 43.37 (43.44) | 4.20 (4.16)   | 5.45 (5.27)   |

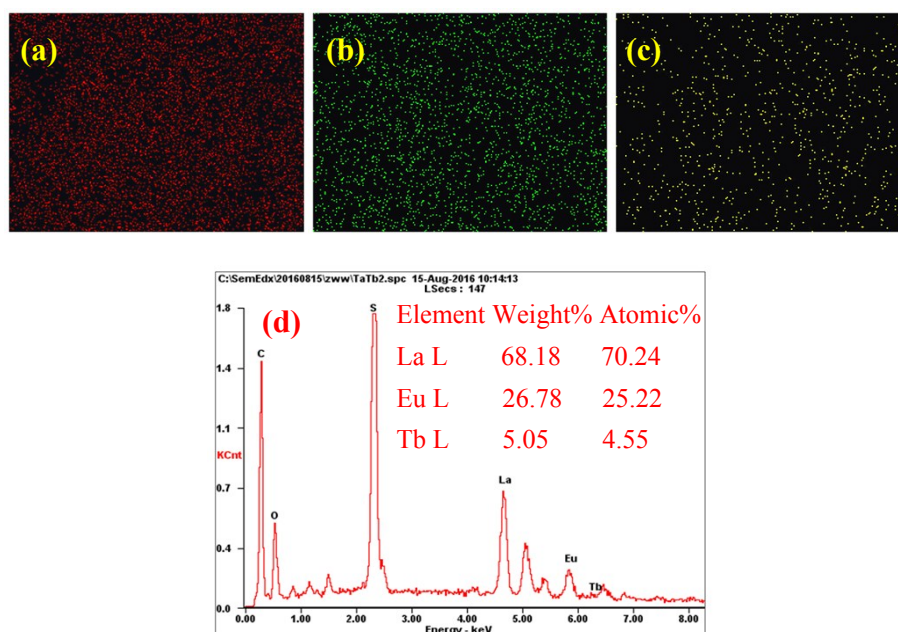

**Fig. S2** (a, b, c) Elemental mapping images of **Eu<sub>0.25</sub>Tb<sub>0.045</sub>La<sub>0.705</sub>-TATB** (red, green and yellow dots represent the La, Eu and Tb elements, respectively) and (d) EDX-spectra of **Eu<sub>0.25</sub>Tb<sub>0.045</sub>La<sub>0.705</sub>-TATB**.

**Table S3** Crystallographic data and structural refinements for **2, 3, 4, 6** and **7**

| Compound                                       | 2                                                                                             | 3                                                                                             | 4                                                                                             | 6                                                                                             | 7                                                                                             |
|------------------------------------------------|-----------------------------------------------------------------------------------------------|-----------------------------------------------------------------------------------------------|-----------------------------------------------------------------------------------------------|-----------------------------------------------------------------------------------------------|-----------------------------------------------------------------------------------------------|
| Formula                                        | C <sub>65</sub> H <sub>75</sub> Ce <sub>2</sub> N <sub>7</sub> O <sub>21</sub> S <sub>7</sub> | C <sub>65</sub> H <sub>75</sub> Pr <sub>2</sub> N <sub>7</sub> O <sub>21</sub> S <sub>7</sub> | C <sub>65</sub> H <sub>75</sub> Sm <sub>2</sub> N <sub>7</sub> O <sub>21</sub> S <sub>7</sub> | C <sub>64</sub> H <sub>75</sub> Nd <sub>2</sub> N <sub>7</sub> O <sub>22</sub> S <sub>6</sub> | C <sub>64</sub> H <sub>75</sub> Gd <sub>2</sub> N <sub>7</sub> O <sub>22</sub> S <sub>6</sub> |
| Formula weight                                 | 1795.00                                                                                       | 1796.60                                                                                       | 1815.50                                                                                       | 1775.18                                                                                       | 1801.20                                                                                       |
| Temperature (K)                                | 293(2)                                                                                        | 293(2)                                                                                        | 293(2)                                                                                        | 293(2)                                                                                        | 293(2)                                                                                        |
| Crystal system                                 | Triclinic                                                                                     | Triclinic                                                                                     | Triclinic                                                                                     | Triclinic                                                                                     | Triclinic                                                                                     |
| Space group                                    | <i>P</i> -1                                                                                   |
| <i>a</i> (Å)                                   | 16.1339(6)                                                                                    | 16.1230(8)                                                                                    | 16.0585(7)                                                                                    | 16.0917(6)                                                                                    | 16.0579(7)                                                                                    |
| <i>b</i> (Å)                                   | 16.3437(6)                                                                                    | 16.3385(8)                                                                                    | 16.3646(7)                                                                                    | 16.3567(6)                                                                                    | 16.2365(7)                                                                                    |
| <i>c</i> (Å)                                   | 17.2177(6)                                                                                    | 17.2058(8)                                                                                    | 17.1438(7)                                                                                    | 17.1769(6)                                                                                    | 17.1282(8)                                                                                    |
| $\alpha$ (deg)                                 | 111.1013(10)                                                                                  | 110.6340(10)                                                                                  | 110.3627(7)                                                                                   | 110.7240(10)                                                                                  | 109.6540(10)                                                                                  |
| $\beta$ (deg)                                  | 110.6951(10)                                                                                  | 110.9040(10)                                                                                  | 111.0098(7)                                                                                   | 110.8480(10)                                                                                  | 111.3560(10)                                                                                  |
| $\gamma$ (deg)                                 | 96.1766(12)                                                                                   | 96.3680(10)                                                                                   | 96.5967(8)                                                                                    | 96.3870(10)                                                                                   | 96.9450(10)                                                                                   |
| <i>V</i> (Å <sup>3</sup> )                     | 3816.2(2)                                                                                     | 3814.6(3)                                                                                     | 3792.2(3)                                                                                     | 3803.4(2)                                                                                     | 3762.9(3)                                                                                     |
| <i>Z</i>                                       | 2                                                                                             | 2                                                                                             | 1                                                                                             | 2                                                                                             | 2                                                                                             |
| <i>F</i> (000)                                 | 1636                                                                                          | 1640                                                                                          | 1628                                                                                          | 1596                                                                                          | 1612                                                                                          |
| GOF                                            | 1.148                                                                                         | 0.965                                                                                         | 1.123                                                                                         | 1.096                                                                                         | 1.105                                                                                         |
| <i>R</i> <sub>1</sub> , <i>wR</i> <sub>2</sub> | 0.0548, 0.1619                                                                                | 0.0500, 0.1496                                                                                | 0.0502, 0.1567                                                                                | 0.0531, 0.1658                                                                                | 0.0545, 0.1762                                                                                |

[*I* > 2 $\sigma$ (*I*)]<sup>a</sup>

$$^a R_1 = \frac{\sum ||F_o| - |F_c||}{\sum |F_o|}, wR_2 = \left\{ \frac{\sum [w(F_o^2 - F_c^2)^2]}{\sum [w(F_o^2)^2]} \right\}^{1/2}$$

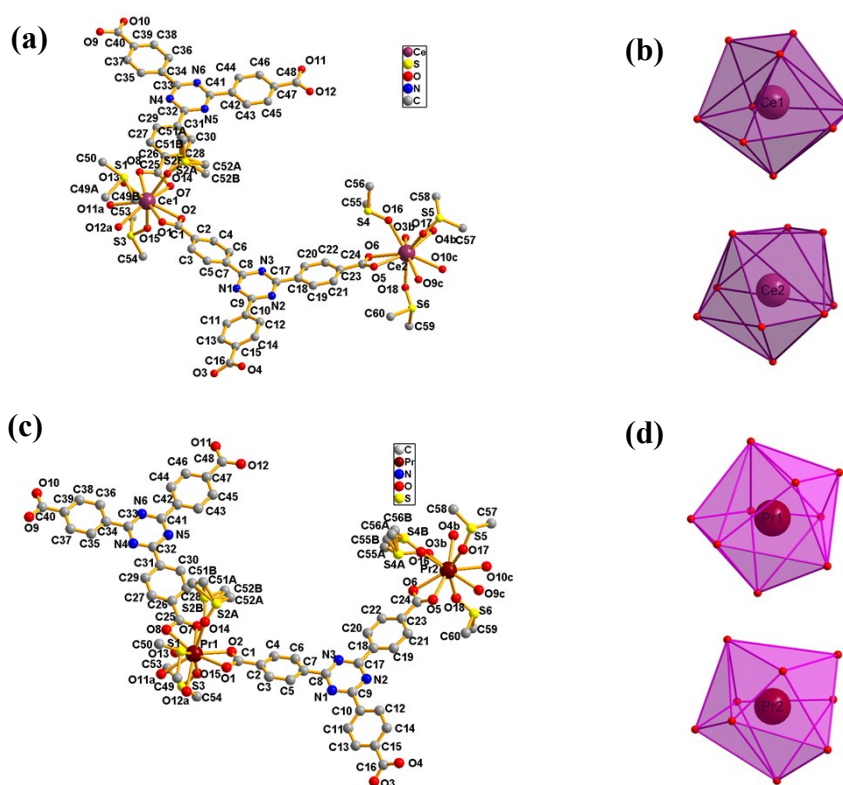

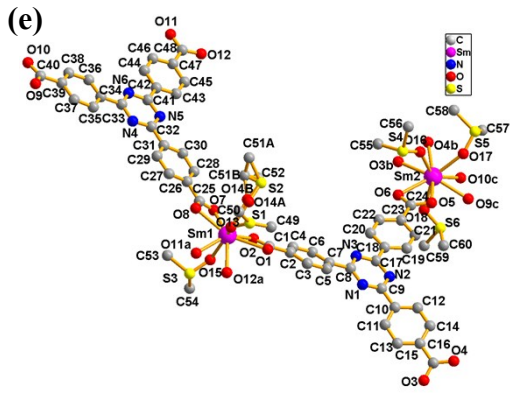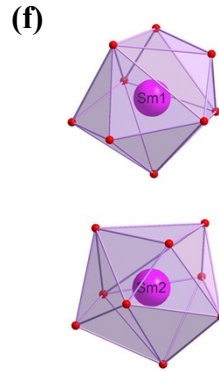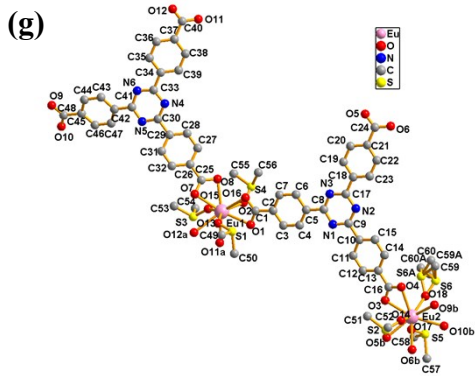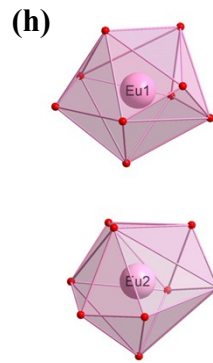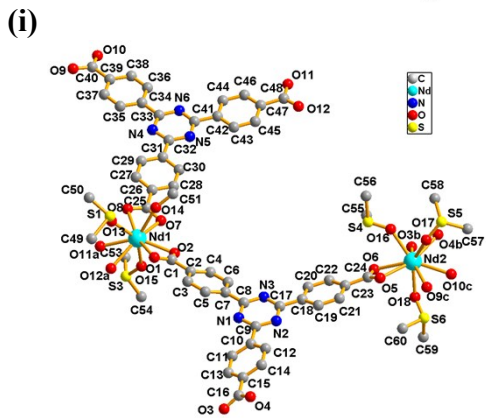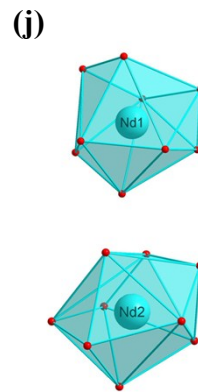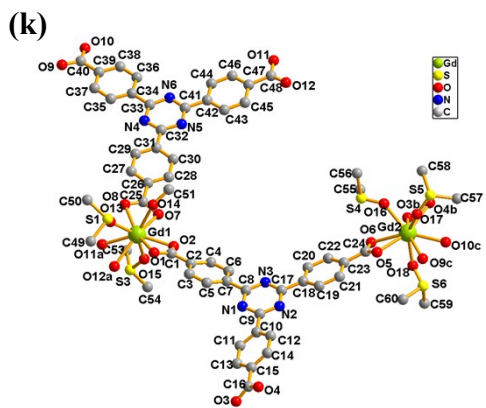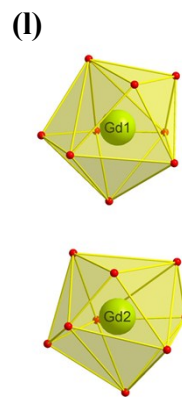

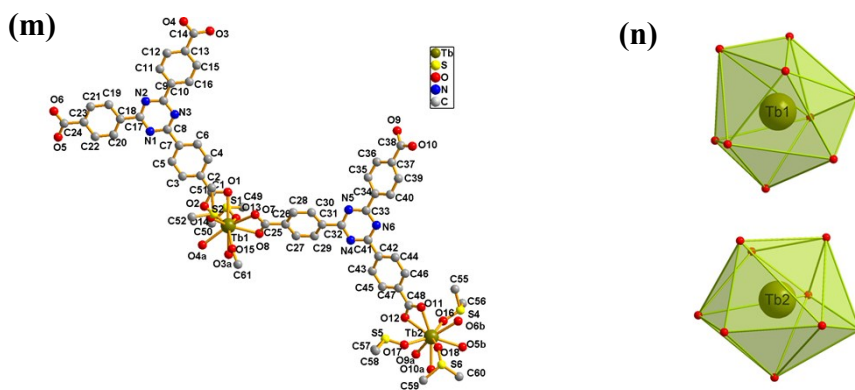

**Fig. S3** (a) Coordination environments of Ce<sup>3+</sup> ions with the H atoms omitted for clarity; symmetry codes: a = x, y, 1+z; b = x, y, -1+z; c = -2+x, -1+y, -1+ z; (b) Coordination polyhedron of Ce<sup>3+</sup> ions; (c) Coordination environments of Pr<sup>3+</sup> ions with the H atoms omitted for clarity; symmetry codes: a = x, y, 1+z; b = x, y, -1+z; c = -2+x, -1+y, -1+z; (d) Coordination polyhedron of Pr<sup>3+</sup> ions; (e) Coordination environments of Sm<sup>3+</sup> ions with the H atoms omitted for clarity; symmetry codes: a = x, y, 1+z; b = x, y, -1+z; c = -2+x, -1+y, -1+ z; (f) Coordination polyhedron of Sm<sup>3+</sup> ions; (g) Coordination environments of Eu<sup>3+</sup> ions with the H atoms omitted for clarity; symmetry codes: a = x, y, -1+z; b = 2+x, 1+y, z; (h) Coordination polyhedron of Eu<sup>3+</sup> ions; (i) Coordination environments of Nd<sup>3+</sup> ions with the H atoms omitted for clarity; symmetry codes: a = x, y, 1+z; b = x, y, -1+z; c = -2+x, -1+y, -1+ z; (j) Coordination polyhedron of Nd<sup>3+</sup> ions; (k) Coordination environments of Gd<sup>3+</sup> ions with the H atoms omitted for clarity; symmetry codes: a = x, y, 1+z; b = x, y, -1+z; c = -2+x, -1+y, -1+ z; (l) Coordination polyhedron of Gd<sup>3+</sup> ions; (m) Coordination environments of Tb<sup>3+</sup> ions with the H atoms omitted for clarity; symmetry codes: a = x, y, 1+z; b = 2+x, 1+y, z; (n) Coordination polyhedron of Tb<sup>3+</sup> ions.

**Table S4** Selected bond distances (Å) in **1–8**

| 1       |          |         |           |         |          |
|---------|----------|---------|-----------|---------|----------|
| La1–O15 | 2.473(9) | La1–O14 | 2.484(10) | La1–O13 | 2.497(9) |
| La1–O2  | 2.534(7) | La1–O7  | 2.565(7)  | La1–O11 | 2.576(6) |
| La1–O8  | 2.613(7) | La1–O12 | 2.628(6)  | La1–O1  | 2.670(7) |
| La2–O16 | 2.488(7) | La2–O18 | 2.494(8)  | La2–O17 | 2.494(9) |
| La2–O5  | 2.555(6) | La2–O4  | 2.579(7)  | La2–O10 | 2.587(6) |
| La2–O9  | 2.603(6) | La2–O3  | 2.641(8)  | La2–O6  | 2.689(7) |
| 2       |          |         |           |         |          |
| Ce1–O13 | 2.460(5) | Ce1–O15 | 2.478(4)  | Ce1–O14 | 2.491(5) |
| Ce1–O2  | 2.526(4) | Ce1–O11 | 2.538(4)  | Ce1–O7  | 2.547(4) |
| Ce1–O8  | 2.586(4) | Ce1–O12 | 2.603(4)  | Ce1–O1  | 2.632(4) |
| Ce2–O16 | 2.470(4) | Ce2–O18 | 2.482(4)  | Ce2–O17 | 2.486(4) |
| Ce2–O5  | 2.543(3) | Ce2–O4  | 2.554(4)  | Ce2–O10 | 2.564(3) |
| Ce2–O9  | 2.576(3) | Ce2–O3  | 2.578(4)  | Ce2–O6  | 2.668(4) |
| 3       |          |         |           |         |          |
| Pr1–O13 | 2.450(4) | Pr1–O15 | 2.453(4)  | Pr1–O14 | 2.481(5) |
| Pr1–O2  | 2.501(4) | Pr1–O11 | 2.532(3)  | Pr1–O7  | 2.533(4) |
| Pr1–O8  | 2.552(4) | Pr1–O12 | 2.589(4)  | Pr1–O1  | 2.622(4) |
| Pr2–O16 | 2.448(4) | Pr2–O18 | 2.464(4)  | Pr2–O17 | 2.467(4) |
| Pr2–O5  | 2.518(3) | Pr2–O4  | 2.532(4)  | Pr2–O10 | 2.548(3) |
| Pr2–O3  | 2.548(4) | Pr2–O9  | 2.561(3)  | Pr2–O6  | 2.665(4) |
| 4       |          |         |           |         |          |
| Sm1–O13 | 2.398(5) | Sm1–O15 | 2.414(5)  | Sm1–O14 | 2.424(2) |
| Sm1–O2  | 2.452(5) | Sm1–O11 | 2.473(4)  | Sm1–O7  | 2.498(4) |
| Sm1–O8  | 2.517(4) | Sm1–O12 | 2.549(4)  | Sm1–O1  | 2.588(4) |
| Sm2–O16 | 2.410(5) | Sm2–O17 | 2.421(5)  | Sm2–O18 | 2.425(4) |
| Sm2–O5  | 2.471(4) | Sm2–O4  | 2.499(4)  | Sm2–O10 | 2.502(4) |
| Sm2–O9  | 2.517(4) | Sm2–O3  | 2.523(4)  | Sm2–O6  | 2.643(4) |
| 5       |          |         |           |         |          |
| Eu1–O15 | 2.390(5) | Eu1–O13 | 2.414(5)  | Eu1–O16 | 2.429(6) |
| Eu1–O11 | 2.451(5) | Eu1–O2  | 2.490(5)  | Eu1–O8  | 2.495(5) |
| Eu1–O7  | 2.503(5) | Eu1–O1  | 2.504(5)  | Eu1–O12 | 2.642(5) |
| Eu2–O17 | 2.389(6) | Eu2–O14 | 2.405(6)  | Eu2–O18 | 2.411(7) |
| Eu2–O9  | 2.438(5) | Eu2–O5  | 2.473(5)  | Eu2–O4  | 2.490(5) |
| Eu2–O3  | 2.501(5) | Eu2–O6  | 2.531(5)  | Eu2–O10 | 2.580(5) |
| 6       |          |         |           |         |          |
| Nd1–O13 | 2.422(5) | Nd1–O15 | 2.432(4)  | Nd1–O14 | 2.467(5) |
| Nd1–O2  | 2.481(4) | Nd1–O11 | 2.509(4)  | Nd1–O7  | 2.525(4) |
| Nd1–O8  | 2.544(4) | Nd1–O12 | 2.568(4)  | Nd1–O1  | 2.611(4) |
| Nd2–O16 | 2.431(4) | Nd2–O17 | 2.450(4)  | Nd2–O18 | 2.455(4) |
| Nd2–O5  | 2.499(4) | Nd2–O4  | 2.523(4)  | Nd2–O10 | 2.530(3) |
| Nd2–O3  | 2.537(4) | Nd2–O9  | 2.543(3)  | Nd2–O6  | 2.657(4) |

| 7       |          |         |          |         |          |
|---------|----------|---------|----------|---------|----------|
| Gd1–O13 | 2.348(5) | Gd1–O15 | 2.393(5) | Gd1–O14 | 2.403(6) |
| Gd1–O2  | 2.415(5) | Gd1–O11 | 2.463(4) | Gd1–O7  | 2.468(4) |
| Gd1–O8  | 2.493(4) | Gd1–O12 | 2.513(4) | Gd1–O1  | 2.575(4) |
| Gd2–O16 | 2.378(4) | Gd2–O18 | 2.397(4) | Gd2–O17 | 2.403(5) |
| Gd2–O5  | 2.439(4) | Gd2–O10 | 2.465(4) | Gd2–O3  | 2.476(4) |
| Gd2–O4  | 2.484(5) | Gd2–O9  | 2.487(4) | Gd2–O6  | 2.635(4) |
| 8       |          |         |          |         |          |
| Tb1–O14 | 2.354(5) | Tb1–O13 | 2.377(5) | Tb1–O8  | 2.400(5) |
| Tb1–O15 | 2.401(6) | Tb1–O2  | 2.447(5) | Tb1–O3  | 2.464(5) |
| Tb1–O4  | 2.477(5) | Tb1–O1  | 2.505(5) | Tb1–O7  | 2.576(5) |
| Tb2–O17 | 2.380(5) | Tb2–O18 | 2.391(5) | Tb2–O16 | 2.396(5) |
| Tb2–O11 | 2.432(5) | Tb2–O5  | 2.456(4) | Tb2–O10 | 2.459(5) |
| Tb2–O9  | 2.463(5) | Tb2–O6  | 2.476(4) | Tb2–O12 | 2.633(5) |

**Table S5** Selected bond angles (°) in **1–8**

| 1           |          |             |          |
|-------------|----------|-------------|----------|
| O15–La1–O14 | 145.7(3) | O15–La1–O13 | 142.2(3) |
| O14–La1–O13 | 71.7(4)  | O15–La1–O2  | 74.9(3)  |
| O14–La1–O2  | 80.1(4)  | O13–La1–O2  | 133.8(3) |
| O15–La1–O7  | 76.7(3)  | O14–La1–O7  | 74.1(3)  |
| O13–La1–O7  | 128.7(3) | O2–La1–O7   | 73.9(2)  |
| O15–La1–O11 | 72.7(3)  | O14–La1–O11 | 135.2(3) |
| O13–La1–O11 | 71.8(3)  | O2–La1–O11  | 144.7(3) |
| O7–La1–O11  | 111.1(2) | O15–La1–O8  | 92.9(3)  |
| O14–La1–O8  | 81.7(4)  | O13–La1–O8  | 88.1(3)  |
| O2–La1–O8   | 123.7(2) | O7–La1–O8   | 49.8(2)  |
| O11–La1–O8  | 71.8(2)  | O15–La1–O12 | 75.1(3)  |
| O14–La1–O12 | 135.9(3) | O13–La1–O12 | 72.5(3)  |
| O2–La1–O12  | 107.9(3) | O7–La1–O12  | 150.0(3) |
| O11–La1–O12 | 50.0(2)  | O8–La1–O12  | 121.8(2) |
| O15–La1–O1  | 98.8(3)  | O14–La1–O1  | 82.6(3)  |
| O13–La1–O1  | 89.1(3)  | O2–La1–O1   | 50.7(3)  |
| O7–La1–O1   | 122.9(2) | O11–La1–O1  | 121.8(2) |
| O8–La1–O1   | 164.2(3) | O12–La1–O1  | 71.9(2)  |
| O16–La2–O18 | 145.5(3) | O16–La2–O17 | 69.2(3)  |
| O18–La2–O17 | 143.4(3) | O16–La2–O5  | 79.5(3)  |
| O18–La2–O5  | 80.7(3)  | O17–La2–O5  | 103.3(3) |
| O16–La2–O4  | 86.3(3)  | O18–La2–O4  | 108.2(3) |
| O17–La2–O4  | 77.7(3)  | O5–La2–O4   | 164.3(2) |
| O16–La2–O10 | 140.3(3) | O18–La2–O10 | 74.0(3)  |
| O17–La2–O10 | 73.6(3)  | O5–La2–O10  | 123.2(2) |
| O4–La2–O10  | 72.4(2)  | O16–La2–O9  | 126.2(3) |



|             |            |             |            |
|-------------|------------|-------------|------------|
| O18-La2-O9  | 73.5(2)    | O17-La2-O9  | 72.9(3)    |
| O5-La2-O9   | 73.62(19)  | O4-La2-O9   | 120.96(19) |
| O10-La2-O9  | 50.75(19)  | O16-La2-O3  | 76.9(3)    |
| O18-La2-O3  | 88.6(3)    | O17-La2-O3  | 118.8(3)   |
| O5-La2-O3   | 118.8(2)   | O4-La2-O3   | 50.3(2)    |
| O10-La2-O3  | 110.6(2)   | O9-La2-O3   | 156.6(3)   |
| O16-La2-O6  | 71.9(3)    | O18-La2-O6  | 73.7(3)    |
| O17-La2-O6  | 136.2(3)   | O5-La2-O6   | 49.7(2)    |
| O4-La2-O6   | 119.2(2)   | O10-La2-O6  | 147.8(3)   |
| O9-La2-O6   | 117.58(19) | O3-La2-O6   | 69.4(2)    |
| 2           |            |             |            |
| O13-Ce1-O15 | 142.88(15) | O13-Ce1-O14 | 72.06(19)  |
| O15-Ce1-O14 | 144.78(17) | O13-Ce1-O2  | 133.81(16) |
| O15-Ce1-O2  | 74.93(16)  | O14-Ce1-O2  | 78.8(2)    |
| O13-Ce1-O11 | 72.11(15)  | O15-Ce1-O11 | 72.91(14)  |
| O14-Ce1-O11 | 136.02(18) | O2-Ce1-O11  | 145.20(16) |
| O13-Ce1-O7  | 127.95(16) | O15-Ce1-O7  | 76.78(16)  |
| O14-Ce1-O7  | 73.57(18)  | O2-Ce1-O7   | 73.57(13)  |
| O11-Ce1-O7  | 111.02(13) | O13-Ce1-O8  | 86.98(16)  |
| O15-Ce1-O8  | 93.35(15)  | O14-Ce1-O8  | 82.20(18)  |
| O2-Ce1-O8   | 123.89(13) | O11-Ce1-O8  | 71.28(12)  |
| O7-Ce1-O8   | 50.43(12)  | O13-Ce1-O12 | 73.06(16)  |
| O15-Ce1-O12 | 75.43(15)  | O14-Ce1-O12 | 135.92(17) |
| O2-Ce1-O12  | 108.09(14) | O11-Ce1-O12 | 50.71(11)  |
| O7-Ce1-O12  | 150.51(16) | O8-Ce1-O12  | 121.82(11) |
| O13-Ce1-O1  | 89.36(15)  | O15-Ce1-O1  | 100.05(15) |
| O14-Ce1-O1  | 80.03(18)  | O2-Ce1-O1   | 50.22(13)  |
| O11-Ce1-O1  | 123.96(12) | O7-Ce1-O1   | 121.42(12) |
| O8-Ce1-O1   | 162.13(14) | O12-Ce1-O1  | 73.46(12)  |
| O16-Ce2-O18 | 145.77(13) | O16-Ce2-O17 | 69.32(14)  |
| O18-Ce2-O17 | 143.14(14) | O16-Ce2-O5  | 80.27(14)  |
| O18-Ce2-O5  | 80.86(14)  | O17-Ce2-O5  | 102.52(14) |
| O16-Ce2-O4  | 84.24(14)  | O18-Ce2-O4  | 109.54(14) |
| O17-Ce2-O4  | 77.16(15)  | O5-Ce2-O4   | 163.45(13) |
| O16-Ce2-O10 | 139.76(14) | O18-Ce2-O10 | 74.16(14)  |
| O17-Ce2-O10 | 73.83(14)  | O5-Ce2-O10  | 123.92(11) |
| O4-Ce2-O10  | 72.19(11)  | O16-Ce2-O9  | 127.43(14) |
| O18-Ce2-O9  | 73.33(13)  | O17-Ce2-O9  | 72.47(14)  |
| O5-Ce2-O9   | 74.24(11)  | O4-Ce2-O9   | 120.51(11) |
| O10-Ce2-O9  | 50.84(11)  | O16-Ce2-O3  | 78.22(15)  |
| O18-Ce2-O3  | 86.86(14)  | O17-Ce2-O3  | 120.34(14) |
| O5-Ce2-O3   | 119.86(11) | O4-Ce2-O3   | 50.35(11)  |
| O10-Ce2-O3  | 108.08(13) | O9-Ce2-O3   | 153.97(15) |
| O16-Ce2-O6  | 72.39(14)  | O18-Ce2-O6  | 73.60(14)  |

|             |            |             |            |
|-------------|------------|-------------|------------|
| O17-Ce2-O6  | 136.09(14) | O5-Ce2-O6   | 49.68(11)  |
| O4-Ce2-O6   | 119.56(11) | O10-Ce2-O6  | 147.76(14) |
| O9-Ce2-O6   | 117.91(11) | O3-Ce2-O6   | 70.33(11)  |
| <b>3</b>    |            |             |            |
| O13-Pr1-O15 | 143.16(16) | O13-Pr1-O14 | 72.19(19)  |
| O15-Pr1-O14 | 144.35(18) | O13-Pr1-O2  | 133.88(17) |
| O15-Pr1-O2  | 74.87(16)  | O14-Pr1-O2  | 78.4(2)    |
| O13-Pr1-O11 | 72.32(15)  | O15-Pr1-O11 | 72.90(13)  |
| O14-Pr1-O11 | 136.39(19) | O2-Pr1-O11  | 145.17(16) |
| O13-Pr1-O7  | 127.97(17) | O15-Pr1-O7  | 76.27(16)  |
| O14-Pr1-O7  | 73.79(19)  | O2-Pr1-O7   | 73.52(13)  |
| O11-Pr1-O7  | 110.64(13) | O13-Pr1-O8  | 85.95(17)  |
| O15-Pr1-O8  | 94.17(17)  | O14-Pr1-O8  | 81.7(2)    |
| O2-Pr1-O8   | 124.26(13) | O11-Pr1-O8  | 71.30(12)  |
| O7-Pr1-O8   | 50.95(12)  | O13-Pr1-O12 | 73.78(16)  |
| O15-Pr1-O12 | 75.27(15)  | O14-Pr1-O12 | 136.18(18) |
| O2-Pr1-O12  | 107.52(14) | O11-Pr1-O12 | 51.30(11)  |
| O7-Pr1-O12  | 150.02(16) | O8-Pr1-O12  | 122.39(12) |
| O13-Pr1-O1  | 89.11(16)  | O15-Pr1-O1  | 100.46(15) |
| O14-Pr1-O1  | 79.71(19)  | O2-Pr1-O1   | 50.60(13)  |
| O11-Pr1-O1  | 124.00(11) | O7-Pr1-O1   | 121.76(13) |
| O8-Pr1-O1   | 161.40(15) | O12-Pr1-O1  | 72.97(12)  |
| O16-Pr2-O18 | 145.27(14) | O16-Pr2-O17 | 69.74(15)  |
| O18-Pr2-O17 | 143.18(14) | O16-Pr2-O5  | 80.33(14)  |
| O18-Pr2-O5  | 81.37(14)  | O17-Pr2-O5  | 101.10(15) |
| O16-Pr2-O4  | 82.66(15)  | O18-Pr2-O4  | 110.83(15) |
| O17-Pr2-O4  | 77.02(16)  | O5-Pr2-O4   | 162.40(13) |
| O16-Pr2-O10 | 139.65(14) | O18-Pr2-O10 | 74.56(14)  |
| O17-Pr2-O10 | 74.09(14)  | O5-Pr2-O10  | 124.49(11) |
| O4-Pr2-O10  | 72.24(11)  | O16-Pr2-O3  | 78.47(15)  |
| O18-Pr2-O3  | 85.69(14)  | O17-Pr2-O3  | 121.88(15) |
| O5-Pr2-O3   | 120.19(12) | O4-Pr2-O3   | 51.12(12)  |
| O10-Pr2-O3  | 107.10(12) | O16-Pr2-O9  | 128.09(14) |
| O18-Pr2-O9  | 73.58(13)  | O17-Pr2-O9  | 71.95(14)  |
| O5-Pr2-O9   | 74.11(11)  | O4-Pr2-O9   | 120.76(11) |
| O10-Pr2-O9  | 51.42(11)  | O3-Pr2-O9   | 153.12(14) |
| O16-Pr2-O6  | 72.43(14)  | O18-Pr2-O6  | 73.16(14)  |
| O17-Pr2-O6  | 135.84(14) | O5-Pr2-O6   | 50.11(11)  |
| O4-Pr2-O6   | 119.70(11) | O10-Pr2-O6  | 147.73(13) |
| O3-Pr2-O6   | 70.21(11)  | O9-Pr2-O6   | 117.82(11) |
| <b>4</b>    |            |             |            |
| O13-Sm1-O15 | 143.66(17) | O13-Sm1-O14 | 70.4(4)    |
| O15-Sm1-O14 | 145.7(4)   | O13-Sm1-O2  | 134.53(18) |
| O15-Sm1-O2  | 73.91(18)  | O14-Sm1-O2  | 79.7(6)    |

|             |            |             |            |
|-------------|------------|-------------|------------|
| O13-Sm1-O11 | 72.41(17)  | O15-Sm1-O11 | 73.08(16)  |
| O14-Sm1-O11 | 136.1(6)   | O2-Sm1-O11  | 144.20(18) |
| O13-Sm1-O7  | 127.94(18) | O15-Sm1-O7  | 75.75(17)  |
| O14-Sm1-O7  | 76.0(4)    | O2-Sm1-O7   | 73.31(15)  |
| O11-Sm1-O7  | 111.05(15) | O13-Sm1-O8  | 84.77(18)  |
| O15-Sm1-O8  | 95.12(18)  | O14-Sm1-O8  | 82.2(6)    |
| O2-Sm1-O8   | 124.79(16) | O11-Sm1-O8  | 71.89(15)  |
| O7-Sm1-O8   | 51.74(14)  | O13-Sm1-O12 | 74.60(18)  |
| O15-Sm1-O12 | 75.37(16)  | O14-Sm1-O12 | 134.0(4)   |
| O2-Sm1-O12  | 106.14(16) | O11-Sm1-O12 | 51.80(13)  |
| O7-Sm1-O12  | 149.96(17) | O8-Sm1-O12  | 123.42(14) |
| O13-Sm1-O1  | 87.57(17)  | O15-Sm1-O1  | 102.68(17) |
| O14-Sm1-O1  | 76.6(6)    | O2-Sm1-O1   | 51.88(16)  |
| O11-Sm1-O1  | 124.20(14) | O7-Sm1-O1   | 121.85(15) |
| O8-Sm1-O1   | 158.82(18) | O12-Sm1-O1  | 72.94(14)  |
| O16-Sm2-O17 | 70.34(17)  | O16-Sm2-O18 | 144.26(16) |
| O17-Sm2-O18 | 143.59(16) | O16-Sm2-O5  | 80.76(16)  |
| O17-Sm2-O5  | 99.00(17)  | O18-Sm2-O5  | 81.96(17)  |
| O16-Sm2-O4  | 80.24(17)  | O17-Sm2-O4  | 77.47(17)  |
| O18-Sm2-O4  | 112.27(17) | O5-Sm2-O4   | 160.75(16) |
| O16-Sm2-O10 | 139.86(16) | O17-Sm2-O10 | 75.28(17)  |
| O18-Sm2-O10 | 74.82(16)  | O5-Sm2-O10  | 125.33(13) |
| O4-Sm2-O10  | 72.53(14)  | O16-Sm2-O9  | 129.55(16) |
| O17-Sm2-O9  | 71.43(16)  | O18-Sm2-O9  | 73.98(15)  |
| O5-Sm2-O9   | 74.03(13)  | O4-Sm2-O9   | 121.37(14) |
| O10-Sm2-O9  | 52.29(13)  | O16-Sm2-O3  | 78.71(18)  |
| O17-Sm2-O3  | 123.78(16) | O18-Sm2-O3  | 83.95(16)  |
| O5-Sm2-O3   | 121.20(14) | O4-Sm2-O3   | 51.33(14)  |
| O10-Sm2-O3  | 104.84(15) | O9-Sm2-O3   | 151.41(16) |
| O16-Sm2-O6  | 72.13(16)  | O17-Sm2-O6  | 134.94(17) |
| O18-Sm2-O6  | 72.69(16)  | O5-Sm2-O6   | 50.66(13)  |
| O4-Sm2-O6   | 119.37(13) | O10-Sm2-O6  | 147.49(16) |
| O9-Sm2-O6   | 117.89(13) | O3-Sm2-O6   | 70.62(14)  |
| <b>5</b>    |            |             |            |
| O15-Eu1-O13 | 144.16(19) | O15-Eu1-O16 | 70.5(2)    |
| O13-Eu1-O16 | 143.4(19)  | O15-Eu1-O11 | 80.50(19)  |
| O13-Eu1-O11 | 82.30(18)  | O16-Eu1-O11 | 98.3(2)    |
| O15-Eu1-O2  | 139.62(19) | O13-Eu1-O2  | 75.06(19)  |
| O16-Eu1-O2  | 75.3(2)    | O11-Eu1-O2  | 125.92(16) |
| O15-Eu1-O8  | 79.7(2)    | O13-Eu1-O8  | 113.0(2)   |
| O16-Eu1-O8  | 77.4(2)    | O11-Eu1-O8  | 160.05(19) |
| O2-Eu1-O8   | 72.28(17)  | O15-Eu1-O7  | 79.0(2)    |
| O13-Eu1-O7  | 83.53(19)  | O16-Eu1-O7  | 124.6(2)   |
| O11-Eu1-O7  | 121.24(18) | O2-Eu1-O7   | 104.32(17) |

|             |            |             |            |
|-------------|------------|-------------|------------|
| O8-Eu1-O7   | 51.95(18)  | O15-Eu1-O1  | 129.90(19) |
| O13-Eu1-O1  | 73.85(18)  | O16-Eu1-O1  | 71.19(19)  |
| O11-Eu1-O1  | 74.33(16)  | O2-Eu1-O1   | 52.47(15)  |
| O8-Eu1-O1   | 121.16(17) | O7-Eu1-O1   | 150.80(18) |
| O15-Eu1-O12 | 72.29(19)  | O13-Eu1-O12 | 72.47(18)  |
| O16-Eu1-O12 | 134.79(19) | O11-Eu1-O12 | 50.57(16)  |
| O2-Eu1-O12  | 147.50(18) | O8-Eu1-O12  | 119.82(17) |
| O7-Eu1-O12  | 70.77(17)  | O1-Eu1-O12  | 117.73(16) |
| O17-Eu2-O14 | 144.1(2)   | O17-Eu2-O18 | 72.9(3)    |
| O14-Eu2-O18 | 142.6(3)   | O17-Eu2-O9  | 134.0(2)   |
| O14-Eu2-O9  | 73.9(2)    | O18-Eu2-O9  | 78.8(3)    |
| O17-Eu2-O5  | 72.3(2)    | O14-Eu2-O5  | 73.60(18)  |
| O18-Eu2-O5  | 136.7(3)   | O9-Eu2-O5   | 144.5(2)   |
| O17-Eu2-O4  | 128.2(2)   | O14-Eu2-O4  | 75.2(2)    |
| O18-Eu2-O4  | 73.0(3)    | O9-Eu2-O4   | 73.8(2)    |
| O5-Eu2-O4   | 110.85(19) | O17-Eu2-O3  | 84.5(2)    |
| O14-Eu2-O3  | 95.5(2)    | O18-Eu2-O3  | 79.9(3)    |
| O9-Eu2-O3   | 125.39(19) | O5-Eu2-O3   | 71.87(18)  |
| O4-Eu2-O3   | 51.96(18)  | O17-Eu2-O6  | 74.5(2)    |
| O14-Eu2-O6  | 75.88(19)  | O18-Eu2-O6  | 136.9(3)   |
| O9-Eu2-O6   | 105.55(19) | O5-Eu2-O6   | 52.33(16)  |
| O4-Eu2-O6   | 150.0(2)   | O3-Eu2-O6   | 123.88(17) |
| O17-Eu2-O10 | 87.0(2)    | O14-Eu2-O10 | 103.3(2)   |
| O18-Eu2-O10 | 78.0(3)    | O9-Eu2-O10  | 51.60(19)  |
| O5-Eu2-O10  | 124.56(17) | O4-Eu2-O10  | 121.90(18) |
| O3-Eu2-O10  | 157.9(2)   | O6-Eu2-O10  | 72.88(17)  |
| <b>6</b>    |            |             |            |
| O13-Nd1-O15 | 143.77(17) | O13-Nd1-O14 | 72.3(2)    |
| O15-Nd1-O14 | 143.55(18) | O13-Nd1-O2  | 133.79(17) |
| O15-Nd1-O2  | 74.42(17)  | O14-Nd1-O2  | 78.7(2)    |
| O13-Nd1-O11 | 72.59(16)  | O15-Nd1-O11 | 73.10(14)  |
| O14-Nd1-O11 | 136.59(18) | O2-Nd1-O11  | 144.68(17) |
| O13-Nd1-O7  | 127.79(17) | O15-Nd1-O7  | 76.13(16)  |
| O14-Nd1-O7  | 72.9(2)    | O2-Nd1-O7   | 73.51(14)  |
| O11-Nd1-O7  | 111.17(14) | O13-Nd1-O8  | 85.97(17)  |
| O15-Nd1-O8  | 94.06(17)  | O14-Nd1-O8  | 81.2(2)    |
| O2-Nd1-O8   | 124.44(14) | O11-Nd1-O8  | 71.62(13)  |
| O7-Nd1-O8   | 51.10(13)  | O13-Nd1-O12 | 74.32(17)  |
| O15-Nd1-O12 | 75.41(15)  | O14-Nd1-O12 | 136.87(19) |
| O2-Nd1-O12  | 106.78(15) | O11-Nd1-O12 | 51.35(12)  |
| O7-Nd1-O12  | 150.21(16) | O8-Nd1-O12  | 122.79(13) |
| O13-Nd1-O1  | 88.19(16)  | O15-Nd1-O1  | 101.64(16) |
| O14-Nd1-O1  | 79.19(19)  | O2-Nd1-O1   | 50.95(14)  |
| O11-Nd1-O1  | 124.13(12) | O7-Nd1-O1   | 121.53(13) |

|             |            |             |            |
|-------------|------------|-------------|------------|
| O8–Nd1–O1   | 160.39(16) | O12–Nd1–O1  | 73.17(13)  |
| O16–Nd2–O17 | 70.03(15)  | O16–Nd2–O18 | 144.77(15) |
| O17–Nd2–O18 | 143.39(14) | O16–Nd2–O5  | 80.41(15)  |
| O17–Nd2–O5  | 100.02(15) | O18–Nd2–O5  | 81.77(14)  |
| O16–Nd2–O4  | 81.92(15)  | O17–Nd2–O4  | 77.43(15)  |
| O18–Nd2–O4  | 111.13(15) | O5–Nd2–O4   | 161.91(13) |
| O16–Nd–O10  | 139.90(14) | O17–Nd2–O10 | 74.55(14)  |
| O18–Nd2–O10 | 74.64(14)  | O5–Nd2–O10  | 124.54(12) |
| O4–Nd2–O10  | 72.46(12)  | O16–Nd2–O3  | 78.60(16)  |
| O17–Nd2–O3  | 122.73(15) | O18–Nd2–O3  | 84.86(14)  |
| O5–Nd2–O3   | 120.75(13) | O4–Nd2–O3   | 51.11(13)  |
| O10–Nd2–O3  | 106.37(13) | O16–Nd2–O9  | 128.63(14) |
| O17–Nd2–O9  | 71.55(15)  | O18–Nd2–O9  | 73.95(14)  |
| O5–Nd2–O9   | 74.09(12)  | O4–Nd2–O9   | 120.84(12) |
| O10–Nd2–O9  | 51.46(11)  | O3–Nd2–O9   | 152.42(14) |
| O16–Nd2–O6  | 72.23(14)  | O17–Nd2–O6  | 135.36(14) |
| O18–Nd2–O6  | 72.98(14)  | O5–Nd2–O6   | 50.34(12)  |
| O4–Nd2–O6   | 119.69(12) | O10–Nd2–O6  | 147.61(14) |
| O3–Nd2–O6   | 70.53(12)  | O9–Nd2–O6   | 117.88(12) |
| 7           |            |             |            |
| O13–Gd1–O15 | 144.17(18) | O13–Gd1–O14 | 74.6(2)    |
| O15–Gd1–O14 | 140.81(19) | O13–Gd1–O2  | 134.55(18) |
| O15–Gd1–O2  | 73.33(18)  | O14–Gd1–O2  | 77.9(2)    |
| O13–Gd1–O11 | 72.53(18)  | O15–Gd1–O11 | 73.37(16)  |
| O14–Gd1–O11 | 138.41(19) | O2–Gd1–O11  | 143.60(18) |
| O13–Gd1–O7  | 128.26(17) | O15–Gd1–O7  | 74.53(18)  |
| O14–Gd1–O7  | 72.3(2)    | O2–Gd1–O7   | 74.10(16)  |
| O11–Gd1–O7  | 110.28(17) | O13–Gd1–O8  | 83.33(18)  |
| O15–Gd1–O8  | 96.53(19)  | O14–Gd1–O8  | 79.3(2)    |
| O2–Gd1–O8   | 125.93(16) | O11–Gd1–O8  | 72.31(15)  |
| O7–Gd1–O8   | 52.35(15)  | O13–Gd1–O12 | 74.39(18)  |
| O15–Gd1–O12 | 76.41(16)  | O14–Gd1–O12 | 137.70(19) |
| O2–Gd1–O12  | 105.10(16) | O11–Gd1–O12 | 52.52(13)  |
| O7–Gd1–O12  | 149.81(18) | O8–Gd1–O12  | 124.30(15) |
| O13–Gd1–O1  | 86.94(17)  | O15–Gd1–O1  | 103.60(18) |
| O14–Gd1–O1  | 77.9(2)    | O2–Gd1–O1   | 51.98(16)  |
| O11–Gd1–O1  | 124.40(14) | O7–Gd1–O1   | 122.50(16) |
| O8–Gd1–O1   | 156.81(19) | O12–Gd1–O1  | 72.46(15)  |
| O16–Gd2–O18 | 143.45(17) | O16–Gd2–O17 | 70.59(17)  |
| O18–Gd2–O17 | 143.98(16) | O16–Gd2–O5  | 81.15(16)  |
| O18–Gd2–O5  | 82.23(15)  | O17–Gd2–O5  | 97.10(17)  |
| O16–Gd2–O10 | 139.66(16) | O18–Gd2–O10 | 75.37(16)  |
| O17–Gd2–O10 | 76.20(16)  | O5–Gd2–O10  | 125.89(13) |
| O16–Gd2–O3  | 79.10(17)  | O18–Gd2–O3  | 82.59(16)  |

|             |            |             |            |
|-------------|------------|-------------|------------|
| O17-Gd2-O3  | 125.48(17) | O5-Gd2-O3   | 122.02(14) |
| O10-Gd2-O3  | 103.23(14) | O16-Gd2-O4  | 78.69(17)  |
| O18-Gd2-O4  | 113.64(17) | O17-Gd2-O4  | 77.54(18)  |
| O5-Gd2-O4   | 159.79(16) | O10-Gd2-O4  | 72.25(14)  |
| O3-Gd2-O4   | 52.29(15)  | O16-Gd2-O9  | 130.69(16) |
| O18-Gd2-O9  | 74.32(15)  | O17-Gd2-O9  | 70.95(16)  |
| O5-Gd2-O9   | 74.23(13)  | O10-Gd2-O9  | 52.56(13)  |
| O3-Gd2-O9   | 149.83(15) | O4-Gd2-O9   | 120.88(14) |
| O16-Gd2-O6  | 71.97(16)  | O18-Gd2-O6  | 72.26(15)  |
| O17-Gd2-O6  | 133.82(16) | O5-Gd2-O6   | 50.91(13)  |
| O10-Gd2-O6  | 147.59(15) | O3-Gd2-O6   | 71.15(14)  |
| O4-Gd2-O6   | 119.95(14) | O9-Gd2-O6   | 118.07(14) |
| <b>8</b>    |            |             |            |
| O14-Tb1-O13 | 145.0(2)   | O14-Tb1-O8  | 133.3(2)   |
| O13-Tb1-O8  | 73.8(2)    | O14-Tb1-O15 | 73.7(2)    |
| O13-Tb1-O15 | 141.0(2)   | O8-Tb1-O15  | 77.2(2)    |
| O14-Tb1-O2  | 72.96(19)  | O13-Tb1-O2  | 73.75(18)  |
| O8-Tb1-O2   | 144.2(2)   | O15-Tb1-O2  | 138.6(2)   |
| O14-Tb1-O3  | 128.2(2)   | O13-Tb1-O3  | 74.5(2)    |
| O8-Tb1-O3   | 74.06(19)  | O15-Tb1-O3  | 72.9(2)    |
| O2-Tb1-O3   | 110.87(18) | O14-Tb1-O4  | 83.8(2)    |
| O13-Tb1-O4  | 96.2(2)    | O8-Tb1-O4   | 126.01(19) |
| O15-Tb1-O4  | 80.3(2)    | O2-Tb1-O4   | 72.33(17)  |
| O3-Tb1-O4   | 52.47(17)  | O14-Tb1-O1  | 74.79(19)  |
| O13-Tb1-O1  | 76.71(19)  | O8-Tb1-O1   | 104.89(18) |
| O15-Tb1-O1  | 136.7(2)   | O2-Tb1-O1   | 52.72(15)  |
| O3-Tb1-O1   | 150.2(2)   | O4-Tb1-O1   | 124.59(17) |
| O14-Tb1-O7  | 85.71(18)  | O13-Tb1-O7  | 104.4(2)   |
| O8-Tb1-O7   | 52.19(19)  | O15-Tb1-O7  | 76.6(2)    |
| O2-Tb1-O7   | 124.10(17) | O3-Tb1-O7   | 122.54(18) |
| O4-Tb1-O7   | 156.5(2)   | O1-Tb1-O7   | 72.14(17)  |
| O17-Tb2-O18 | 70.49(19)  | O17-Tb2-O16 | 143.80(18) |
| O18-Tb2-O16 | 143.79(19) | O17-Tb2-O11 | 81.05(18)  |
| O18-Tb2-O11 | 97.10(19)  | O16-Tb2-O11 | 82.51(18)  |
| O17-Tb2-O5  | 139.47(18) | O18-Tb2-O5  | 76.18(19)  |
| O16-Tb2-O5  | 75.18(18)  | O11-Tb2-O5  | 126.16(16) |
| O17-Tb2-O10 | 78.46(19)  | O18-Tb2-O10 | 77.2(2)    |
| O16-Tb2-O10 | 113.9(2)   | O11-Tb2-O10 | 159.47(19) |
| O5-Tb2-O10  | 72.13(16)  | O17-Tb2-O9  | 78.97(19)  |
| O18-Tb2-O9  | 125.47(19) | O16-Tb2-O9  | 82.73(18)  |
| O11-Tb2-O9  | 121.76(17) | O5-Tb2-O9   | 103.35(18) |
| O10-Tb2-O9  | 52.71(18)  | O17-Tb2-O6  | 130.47(18) |
| O18-Tb2-O6  | 71.02(18)  | O16-Tb2-O6  | 74.17(17)  |
| O11-Tb2-O6  | 74.05(16)  | O5-Tb2-O6   | 53.00(15)  |

|             |            |             |            |
|-------------|------------|-------------|------------|
| O10-Tb2-O6  | 121.06(16) | O9-Tb2-O6   | 150.23(17) |
| O17-Tb2-O12 | 71.92(18)  | O18-Tb2-O12 | 133.89(19) |
| O16-Tb2-O12 | 72.63(18)  | O11-Tb2-O12 | 51.15(16)  |
| O5-Tb2-O12  | 147.74(18) | O10-Tb2-O12 | 119.80(17) |
| O9-Tb2-O12  | 70.65(17)  | O6-Tb2-O12  | 118.13(16) |

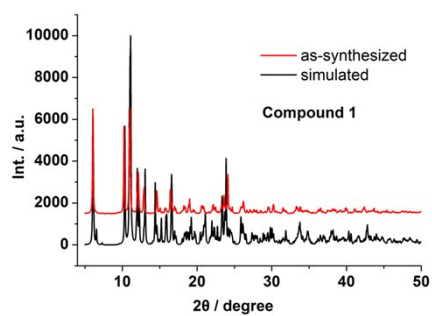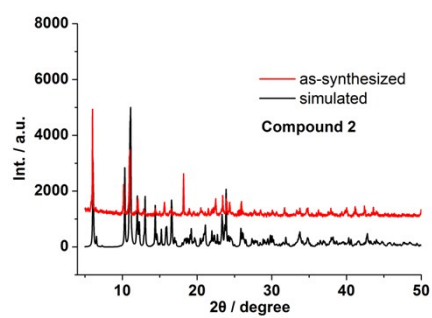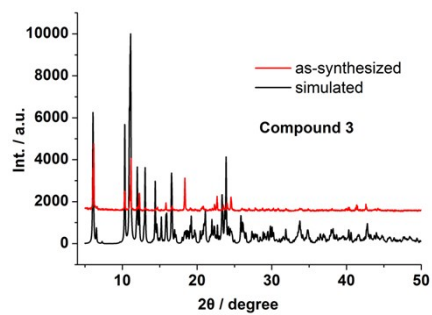

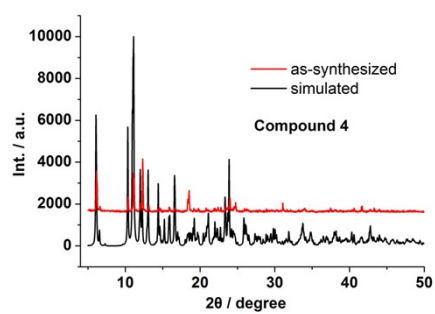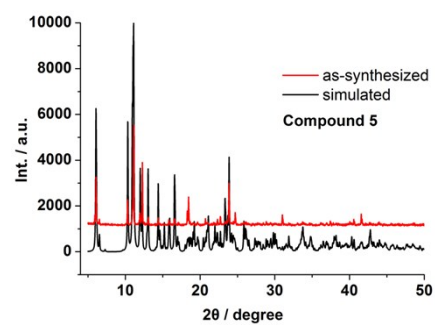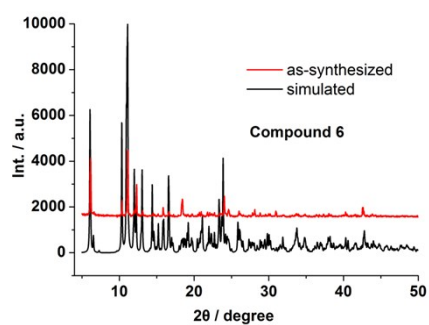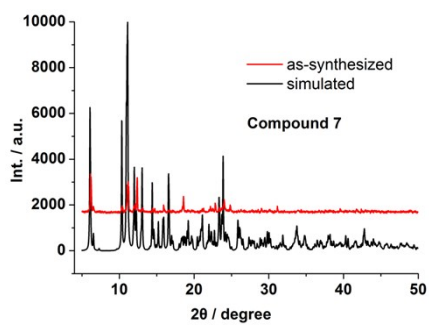



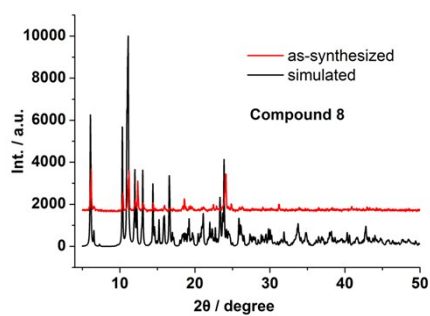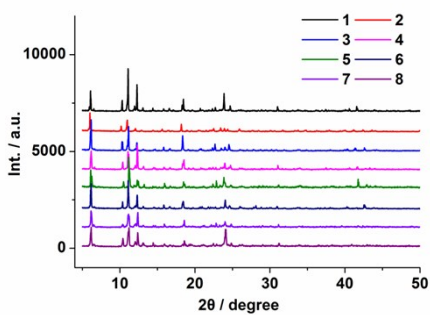

**Fig. S4** PXRD patterns of simulated from the X-ray single-crystal structures and as-synthesized samples of **1–8** and PXRD patterns of **1–8**.

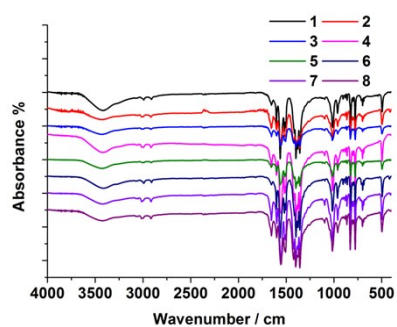

**Fig. S5** The IR spectra of **1–8** recorded from a KBr pellet.

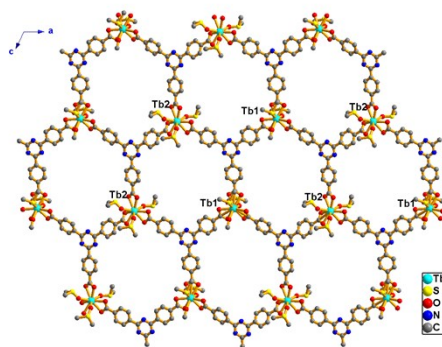

**Fig. S6** View of the monolayer in the *ac* plane of **8**.

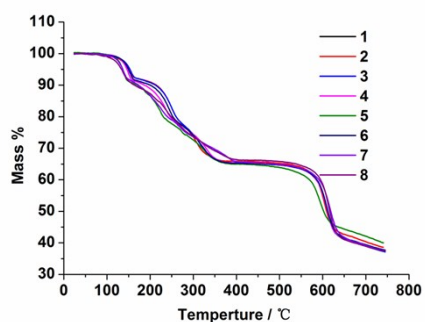

**Fig. S7** The TG curves of **1–8**.

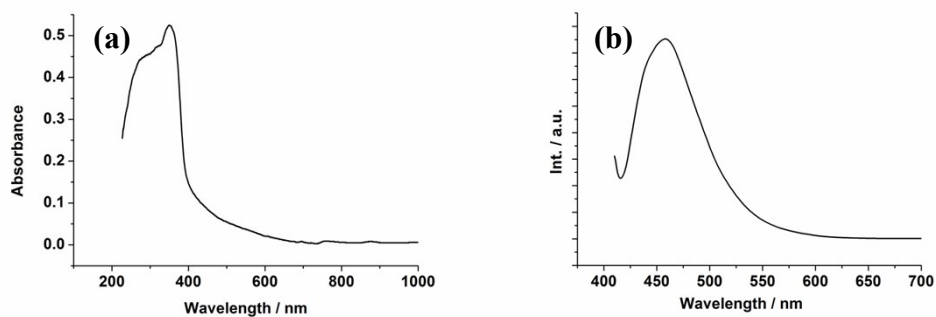

**Fig. S8** (a) UV–vis absorption and (b) emission spectra of H<sub>3</sub>TATB in solid state at room temperature.

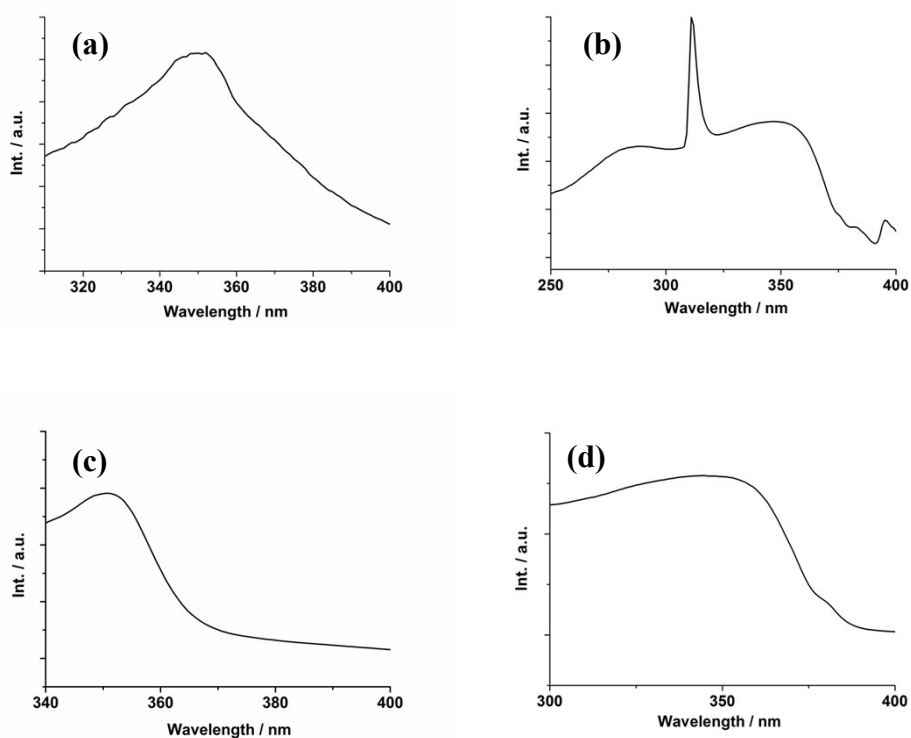

**Fig. S9** The excitation spectra of **1** (a), **5** (b), **7** (c) and **8** (d) in solid state at room temperature, monitored at 466 nm, 619 nm, 466 nm and 546 nm, respectively.

Similarly as that of **1**, compound **7** also shows blue luminescence (Fig. 7b and S10(a), ESI†) with the broadband emission centered at 466 nm excited at 350 nm (the excitation spectra is given in Fig. S9(c), ESI†). It may be attributed to the fact that the lowest excited state of  $\text{Gd}^{3+} \text{}^6\text{P}_{7/2}$  is too high to accept energy from the ligand, thus its characteristic 4f–4f transition is not visible. Such a broadband emission is also assigned to the intraligand  $\pi \leftarrow \pi^*$  transition of  $\text{TATB}^{3-}$ .

The luminescence of compound **2** can be described as a light blue emission (Fig. 7b). It shows two broad emission bands centered at 468 and 490 nm excited at 350 nm (Fig. S10(b), ESI†). The  $\text{Ce}^{3+}$  ion is the only trivalent lanthanide ion, exhibiting reduction of the energy of 5d states by splitting of the crystal and ligand fields that enables 4f→5d excitation within the UV region close to the visible and 5d→4f emission in the visible region of the spectrum.<sup>1</sup>

As shown in Fig. S10(d), ESI,† compound **4** exhibits orange red light upon excitation at 350 nm (Fig. 7b). The visible emission spectrum consists of three emission bands at 565 nm, 603 nm and 647 nm, attributed to  $^4G_{5/2} \rightarrow ^6H_{5/2}$ ,  $^4G_{5/2} \rightarrow ^6H_{7/2}$  and  $^4G_{5/2} \rightarrow ^6H_{9/2}$  transitions, respectively. The strongest transition in the visible region is the  $^4G_{5/2} \rightarrow ^6H_{7/2}$  transition. The transition located at 565 nm,  $^4G_{5/2} \rightarrow ^6H_{5/2}$ , has a predominant magnetic dipole character.<sup>2</sup> Upon excitation with UV light, we also have observed characteristic emission in the NIR region from the  $\text{Sm}^{3+}$  ions in compound **4** (Fig. S10(e), ESI†), which is a rarely described phenomenon. All the NIR emission bands come from the  $^4G_{5/2}$  excited state, among which the strongest band at 940 nm is assigned to  $^4G_{5/2} \rightarrow ^6F_{5/2}$  transition. Two discernible peaks at 1122 and 1190 nm are suspected to be due to the Stark splitting of  $^6F_{9/2}$ .<sup>3</sup>

Upon excitation at 350 nm, the NIR emission spectrum of compound **3** can be obtained (Fig. S10(c), ESI†). It is based on a broad emission signal from 800 to 1500 nm with an emission maximum at 1016 nm, and the three bands located at 881nm, 1016nm and 1480 nm are attributed to the transitions from the excited state ( $^1D_2$ ) to the  $^3F_2$ ,  $^3F_4$  and  $^1G_4$  levels of  $\text{Pr}^{3+}$  ion, respectively.<sup>4</sup>

The emission spectrum of compound **6** clearly shows three NIR emission bands around 870–913 nm, 1056 and 1331 nm upon excitation at 350 nm (Fig. S10(f), ESI†), corresponding to  $^4F_{3/2} \rightarrow ^4I_{9/2}$ ,  $^4F_{3/2} \rightarrow ^4I_{11/2}$  and  $^4F_{3/2} \rightarrow ^4I_{13/2}$  transitions, respectively, which belongs to the characteristic emission of  $\text{Nd}^{3+}$  ions. The  $^4F_{3/2} \rightarrow ^4I_{9/2}$  emission presents splitting, which is mainly attributed to “crystal–field effects” of  $\text{Nd}^{3+}$  ion in a  $C_1$  symmetry.<sup>5</sup> Among the three emission bands, the intensity of 1056 nm emission band is the strongest, and for a long time this center has been found to have potential application in laser systems. The 1331 nm band offers the good opportunity to develop new materials (containing  $\text{Nd}^{3+}$  ion) suitable for the optical amplification operating at 1.3  $\mu\text{m}$ , one of the telecommunication windows.<sup>6</sup>

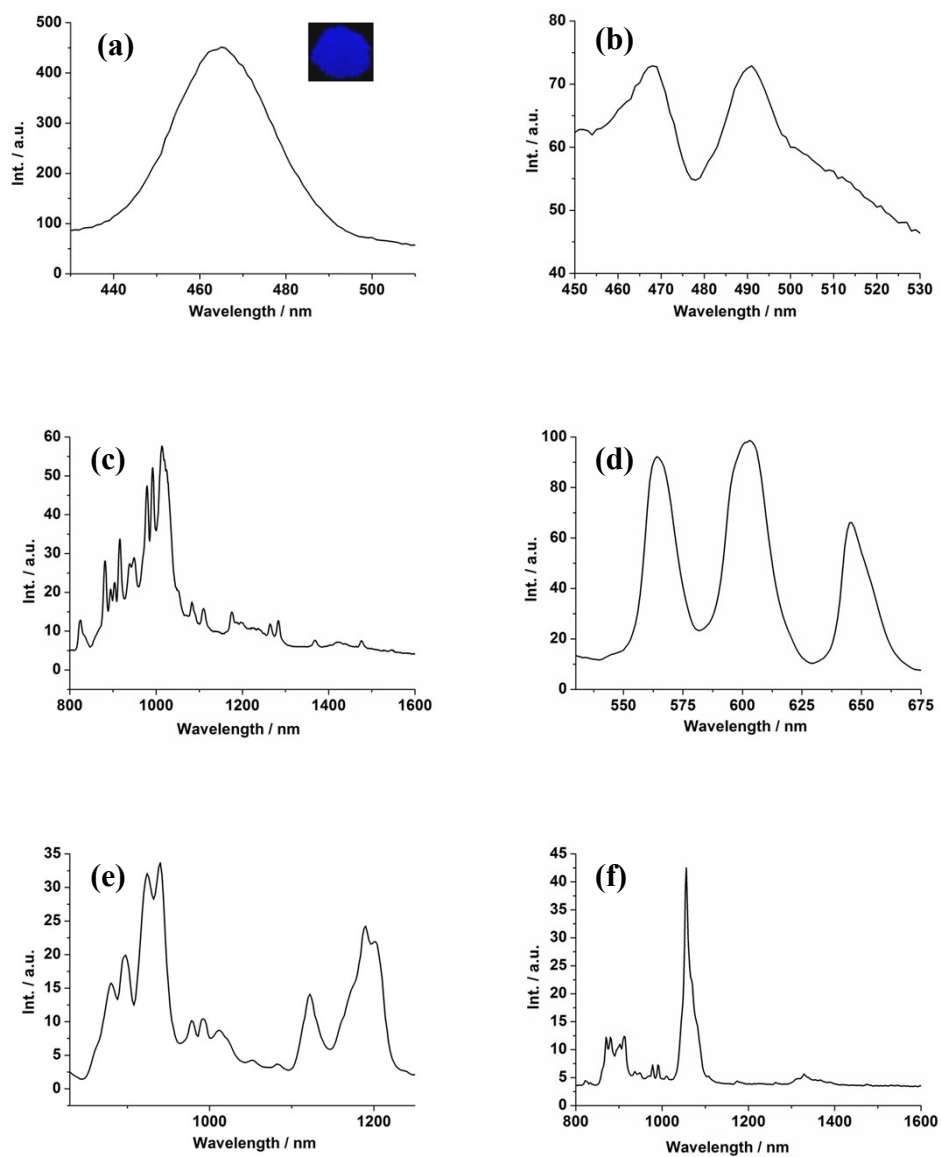

**Fig. S10** Emission spectra of **7** (a), **2** (b) and **4** (d); NIR emission spectra of **3** (c), **4** (e) and **6** (f).

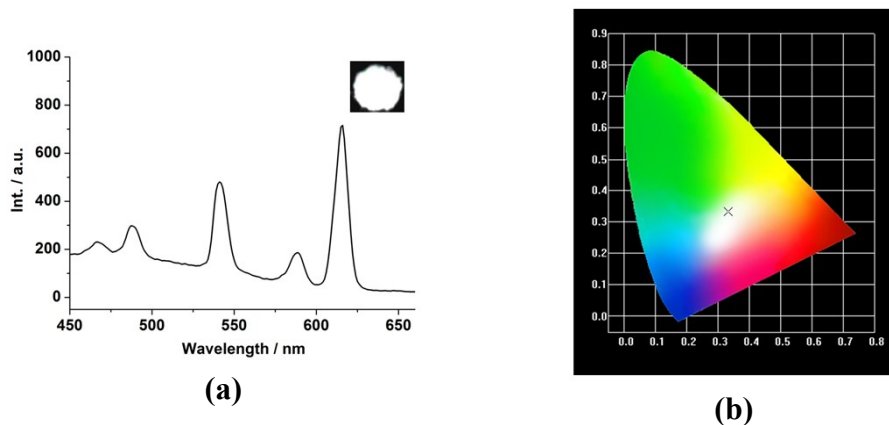

**Fig. S11** (a) Emission spectra and (b) CIE chromaticity diagram for  $\text{Eu}_{0.24}\text{Tb}_{0.03}\text{La}_{0.73}\text{-TATB}$  excited at 350 nm.

**Table S6** The corresponding CIE coordinates of the  $\text{Eu}_x\text{Tb}_y\text{La}_{1-x-y}\text{-TATB}$  excited at 350nm

|                                                                  | CIE chromaticity coordinates |
|------------------------------------------------------------------|------------------------------|
| $\text{Eu}_{0.25}\text{Tb}_{0.045}\text{La}_{0.705}\text{-TATB}$ | (0.3431, 0.3840)             |
| $\text{Eu}_{0.245}\text{Tb}_{0.04}\text{La}_{0.715}\text{-TATB}$ | (0.3320, 0.3711)             |
| $\text{Eu}_{0.255}\text{Tb}_{0.035}\text{La}_{0.71}\text{-TATB}$ | (0.3502, 0.3700)             |
| $\text{Eu}_{0.24}\text{Tb}_{0.03}\text{La}_{0.73}\text{-TATB}$   | <b>(0.3323, 0.3349)</b>      |
| $\text{Eu}_{0.235}\text{Tb}_{0.02}\text{La}_{0.745}\text{-TATB}$ | (0.2980, 0.3391)             |

## References

1. G. Blasse and B. C. Grabmaier, *Luminescent Materials*, SpringerVerlag, Berlin, Germany, 1994.
2. H. N. Li, H. Y. Li, L. K. Li, L. Xu, K. Hou and S. Q. Zang, *Cryst. Growth Des.*, 2015, **15**, 4331.
3. (a) S. Su, W. Chen, C. Qin, S. Song, Z. Guo, G. Li, X. Song, M. Zhu, S. Wang, Z. Hao and H. Zhang, *Cryst. Growth Des.*, 2012, **12**, 1808; (b) K. E. Knope, D. T. de Lill, C. E. Rowland, P. M. Cantos and C. L. Cahill, *Inorg. Chem.*, 2012, **51**,

201.

4. (a) T. J. Foley, B. S. Harrison and A. S. Knefely, *Inorg. Chem.*, 2003, **42**, 5023;  
(b) L. N. Sun, Y. N. Qiu, T. Liu, J. Feng, W. Deng and L.Y. Shi, *Luminescence*, 2015, **30**, 1071.
5. S. Chen, R. Q. Fan, C. F. Sun, P. Wang, Y. L. Yang, Q. Su and Y. Mu, *Cryst. Growth Des.*, 2012, **12**, 1337.
6. L. N. Sun, W. Mai and S. Dang, *J. Mater. Chem.*, 2012, **22**, 5121.
